1 Application of a Semi-empirical Dynamic Model to Forecast  
2 the Propagation of the COVID-19 Epidemics in Spain

3 Mora, Juan C.<sup>1</sup>, Pérez, Sandra<sup>2</sup>, Rodríguez, Ignacio<sup>2</sup>, Núñez, Asunción<sup>3</sup>, and  
4 Dvorzhak, Alla<sup>1</sup>

5 <sup>1</sup>Dept. of Environment, CIEMAT. Avda. Complutense, 40. 28040. Madrid.  
6 Spain

7 <sup>2</sup>Sercomex Pharma. C/ Pollensa, 2. 28232. Las Rozas de Madrid. Spain.

8 <sup>3</sup>Dragonfly Innovation Technologies. 145-157 St. John Street, London, EC1V  
9 4PW. UK.

10 Aug 2020

11 **Abstract**

12 A semi-empirical model, based on the logistic map approach, was developed and applied  
13 to forecast the different phases of the evolution of the COVID-19 epidemic. This model  
14 can be used to make predictions of the propagation of the SARS-CoV-2 virus in different  
15 spatial scales: from a world scale to a country or even a smaller scale. Predictions on persons  
16 hospitalized, number of ventilators needed at ICUs and potential numbers of deaths were  
17 successfully carried out in different countries using this approach. This paper shows the  
18 mathematical basis for the model together with a proposal for its calibration on the different  
19 phases of the epidemic.

20 Specific results are shown for the COVID-19 epidemic in Spain. For predicting the evolu-  
21 tion of the epidemic four phases were considered: non-controlled evolution since the 20<sup>th</sup> of  
22 February; total lock-down from the 15<sup>th</sup> of March; partial easing of the lock-down from the  
23 13<sup>th</sup> of April; and a phased lock-down easing from the 1<sup>st</sup> of May.

24 In a first phase, if no control is established, the model predicted in Spain 12 millions of  
25 infected people of a total of 46.6 millions inhabitants. From those infected nearly 1 million  
26 people would need intensive care and around 700,000 deaths would be directly produced by  
27 the disease. However, as these numbers would occur in a brief period (few months), the  
28 number of deaths would have been higher due to the saturation of the health system.

29 For a second phase, considering a total lock-down of the whole country from the 15<sup>th</sup> of  
30 March, the model predicted for the 17<sup>th</sup> of April 194,000 symptomatic infected cases, 85,700  
31 hospitalized, nearly 8,600 patients with needs of an ICU and 19,500 deaths. The model also  
32 predicted the peak to be produced between the 29<sup>th</sup> of March and the 3<sup>rd</sup> of April. Although  
33 the data are still under revision, the accuracy in all the predictions was very good, as the  
34 reported values by that day were 197,142 infected, 7,548 inpatients needing an ICU and  
35 20,043 deaths. The peak was produced between the 31<sup>st</sup> of May and the 2<sup>nd</sup> of April.

36 For the third phase, the ease of the lock-down which began the 13<sup>th</sup> of April, early  
37 predictions were made by the beginning of April [Mora et al., 2020]. Assuming conservatively  
38 an infection daily rate of a 3% ( $r = 1.03$ ) the model predicted 400,000 infections and  $46,000 \pm$   
39  $15,000$  deaths by the end of May. The predictions overestimated the real values, due to a  
40 stricter reduction of the infection daily rate which lead to values of  $r < 1\%$  and a revision  
41 of the whole series of data by the health authorities carried out along the month of May.  
42 A new prediction performed with updated parameters at the beginning of May provided a  
43 prediction of 250,000 infected and  $29,000 \pm 15,000$  deaths. The reported values by the end  
44 of May were 282,870 infected and 28,552 deaths.

45 After the total easing of the lock-down many uncertainties appear, but the model predicts  
46 that the health system would not saturate if the daily rate of infections  $r$  is kept below 1.02  
47 (2% of daily increase in the number of symptomatic infected).

48 This simple model provides a system to predict the evolution of epidemics with a good  
49 accuracy, even during epidemics development, where other systems have difficulties in their  
50 calibration. As the parameters involved in the model are based in empirical values of the  
51 different quantities (e.g. number of inpatients or deaths, related with the number of infected  
52 persons) it can be dynamically adjusted and adapted to sudden changes in the statistics.

53 As other models, the results provided by this model can be used by the authorities to  
54 support decision making in order to optimize resources and to minimize the consequences of  
55 epidemics, including the future outbreaks of the COVID-19 which will occur.

56 **Keywords**— semi-empirical model; logistic map; COVID-19; SARS-CoV-2

## 57 INTRODUCTION

58 A new respiratory disease, initially dominated by pneumonia, and caused by a coronavirus,  
59 was detected at the province of Hubei, in China, at the end of 2019. It was initially named  
60 by the World Health Organization (WHO) as 2019-nCoV [Zhu et al., 2020] and renamed in  
61 February 2020 by the International Committee on Virus Taxonomy as Severe Acute Respi-  
62 ratory Syndrome coronavirus 2 (SARS-CoV-2), recognizing it as a sister of the SARS-CoV  
63 viruses [Gorbalenya et al., 2020a, Gorbalenya et al., 2020b]. The same day the WHO [World  
64 Health Organization, 2020] named the disease as Coronavirus Disease 2019 (COVID-19).

65 Many efforts have been made since then to mathematically model the spread of the disease  
66 in the whole world and in the different countries where the infection arrived. Modelling the  
67 epidemics has many practical uses: preparation of national health systems; make provisions  
68 of the necessary sanitary material; predict whether and when a saturation of the health sys-  
69 tem could occur; when and to what extent Non Pharmaceutical Interventions (NPI) [Feng  
70 et al., 2010] should be applied; predict the day when those countermeasures can be relaxed,  
71 etc. These theoretical approaches to predict the evolution of epidemics often use compart-  
72 ment models as simple as the SIR model (Susceptible, Infectious and Recovered – sometimes  
73 called Removed) [Kermack et al., 1927], but this model can be increased in complexity to  
74 include different characteristics of an infectious epidemics. For example the model can in-  
75 clude individuals who can infect others, without presenting symptoms, what is known as the  
76 SEIR model (Susceptible, Exposed, Infectious and Removed); the model can also assume that  
77 people who have recovered from the disease lose the immunity after a given time, and there-  
78 fore they could be infected again, giving rise to the SEIRS models (Susceptible, Exposed,  
79 Infected, Removed and Susceptible); also the deaths and births can be included for long  
80 term epidemics, as is the case in the influenza; and many times compartments to distinguish  
81 deaths, recovered, hospitalized, and other situations, are included by using empirical ratios  
82 (see for instance [Brauer, 2008, Munz et al., 2009] for further information).

83 Since the SARS-CoV-2 outbreak many efforts have been carried out to adapt these SIR type  
84 compartment models to the behaviour of this particular virus. For example, a conceptual  
85 representation of a compartment model for COVID-19 disease’s spread, developed by the  
86 authors of this paper, is shown in figure 1, where immunization of recovered is assumed to be  
87 lost after a given period of time, as happen in other infectious diseases (typically immunity  
88 is lost after less than 12 months in the case of the coronavirus causing common cold). Due to  
89 the difficulty of developing and calibrating these models at the early stages of an epidemics,  
90 wrong conclusions are often reached, for instance predicting the timing of the epidemic, and  
91 many times the uncertainties associated with the results of the models are so wide that are not  
92 well accepted by the public. Sometimes the authors of such predictions blamed the quality of  
93 the statistical data [Caudill, 2020, Roda et al., 2020]. However, this quality is severely affected  
94 by the urgency of the epidemic and could not probably be avoided in this or future outbreaks  
95 of epidemics. The continuous publications of medical and epidemiological studies on the  
96 COVID-19, and the associated virus, don’t make it easy to extract good quality information  
97 to adapt the models. But it must be accepted that this situation will be always the case – or  
98 even worst - when new diseases appear.

99 One clear example of problems associated with future predictions of the COVID-19 behaviour  
100 is the uncertainty about the influence of ambient temperature or humidity, which would  
101 influence the seasonality of the disease [Wang et al., 2020]. In the early stages many aspects  
102 of the behaviour of the SARS-CoV-2 virus were associated with previous studies on similar  
103 viruses as the SARS virus, as could be the resilience in fomites (Kampf et al., 2020) or the  
104 immunization of patients recovered from it [Prompetchara et al., 2020]. While writing this

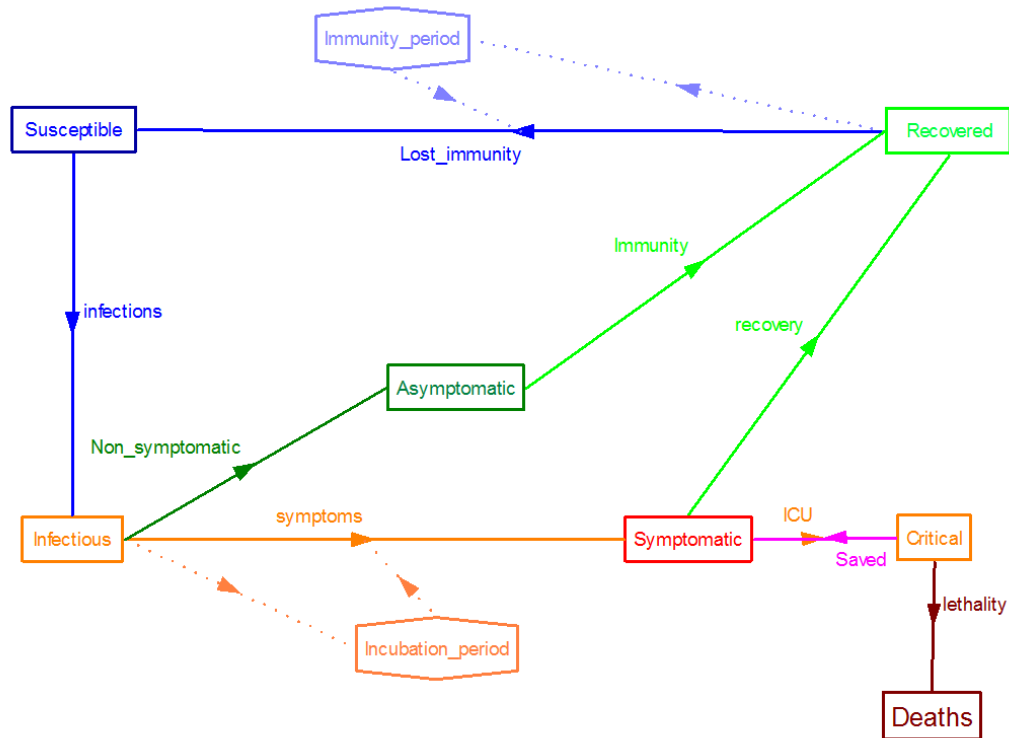

Figure 1: Example of a SIR type compartment model adapted to simulate the behaviour of SARS-CoV-2. In this case we assumed that immunity would be lost in a given period of time.

105 paper many aspects are still under investigation, but in this respect it is believed that, as  
 106 happens with other human coronaviruses causing diseases, like the 15% of the common cold  
 107 cases [Pelczar JR. et al., 2010], immunity will remain for a brief period, of the order of months.

108 During the outbreak of the epidemic in Spain several models were tested and a follow-up of  
 109 the published results were performed to support Spanish national authorities in the decision-  
 110 making process [Mora, 2020], producing a preliminary work covering all the phases which  
 111 was published as a preprint [Mora et al., 2020]. The best results were obtained by using a  
 112 semi-empirical approach presented herein, which has the advantage of performing accurate  
 113 predictions with the minimum amount of information available during this epidemic which,  
 114 very likely, will be the situation in future outbreaks.

115 This paper presents the mathematical development for a proposed semi-empirical model and  
 116 the results obtained using it, focusing the results into the Spanish case. Some results obtained  
 117 for other countries are also presented.

118

## MATERIALS AND METHODS

119

120

121

122

The semi-empirical model presented in this paper, with a proper calibration, produces accurate results at every stage of the epidemic: during the first spread of the disease, after the application of NPI (specifically total lock-down) which were applied in many countries, and after the ease of the lock-down.

123

124

125

126

127

128

Although the instant reproduction number ( $R_t$ ) used by the epidemiologists for estimating the severity of an epidemic is not used in this model, the basic reproduction number ( $R_0$ ) was derived for 10 different countries, ranging from 2.0 to 9.3, which is in a good agreement with previous estimations [Liu et al., 2020]. The  $R_0$  derived from real data are found in table 1, giving an average of  $5.8 \pm 2.4$ , a value almost doubling early estimations [Velavan and Meyer, 2020].

Table 1: Basic Reproductive Number calculated for some studied countries

| Country     | $R_0$ |
|-------------|-------|
| France      | 9.3   |
| USA         | 8.2   |
| Slovenia    | 7.5   |
| Norway      | 6.9   |
| Italy       | 6.7   |
| UK          | 6.7   |
| Spain       | 4.6   |
| Belgium     | 3.5   |
| South Korea | 2.8   |
| Germany     | 2.0   |

129

130

131

132

133

134

135

The model proposed in this paper applies the well-known logistic map, often used for describing the growth of populations and mentioned as an example of chaotic behaviour. This chaotic behaviour depends on a single parameter  $r$  (figure 2 shows a fractal created with the logistic map as a function of  $r$ ). In this equation values of  $r < 1$  would make an epidemic to extinguish. Any  $r$  greater than 1 but below 3 will provide an equilibrium in the size of the population for the long term, while values of  $r$  higher than 3.56995 would produce a chaotic behaviour on the size of the population.

136

Therefore to determine the number of infected diagnosed cases equation 1 is used:

$$I(t) = r \cdot \left(1 - \frac{I(t-1)}{N}\right) \cdot I(t-1) \quad (1)$$

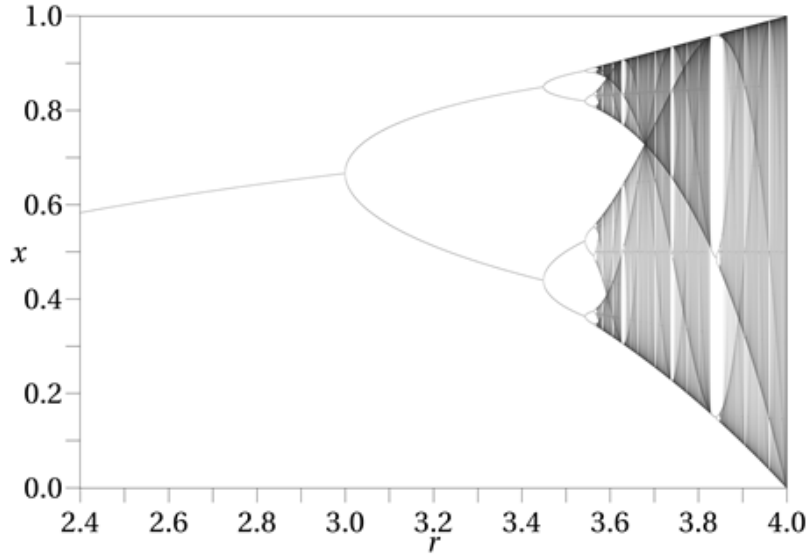

Figure 2: Bifurcation diagram for the logistic map as a function of  $r$ .

137 Where  $I(t)$  is the number of infected diagnosed cases at day  $t$ ,  $I(t-1)$  the infected diagnosed  
 138 cases of the precedent day  $t-1$ ,  $r$  is the growth parameter of the logistic map (named hereafter  
 139 daily infection rate), and  $N$  the number of individuals susceptible to be infected (in figure  
 140 2 a simplified example of this function, with constant parameters, is shown). It should be  
 141 noted that the number of susceptible individuals used here is not necessarily the same as the  
 142 number used for modellers applying SIR type models. The sub-index  $n$  will be used below to  
 143 indicate the  $n$ -th day after the outbreak.

144 The behaviour of this function gives rise to the logistic function and the typical sigmoid shape  
 145 of its cumulative distribution if  $r < 2$ , while it shows a chaotic behaviour if  $r > 3.56995$  (see  
 146 figure 3). Other authors have studied the behaviour of this logistic function applied to the  
 147 COVID-19 epidemics [Fokas et al., 2020, Wu et al., 2020].

148 In order to compare with the values of the basic reproduction number in table 2 the empirically  
 149 determined values of the growth parameter  $r$  are shown for the same countries in table 1.  
 150 This  $r$  parameter is simply measured by dividing the new infected in a given day by the  
 151 infected in the previous day. To avoid statistics biases  $r$  was taken for each country as an  
 152 average for the first 7 days after the initial detections of infected at each country. The  $r$  in  
 153 these countries was equal to  $1.9 \pm 0.5$ , ranging from 1.3 to 3.0. In this approach a value of  
 154  $r < 3$  implies that, in absence of countermeasures, and independently of the initial value  $I(0)$   
 155 there would be reached an unique equilibrium on the number of infected:  $I(\infty) = N \cdot \frac{r-1}{r}$ .  
 156 Worldwide, in average, an equilibrium value of 3.65 billions of infected would be reached  
 157 applying  $r = 1.9$  and  $N = 7.7 \cdot 10^9$  to the equation. The equilibrium values which would be

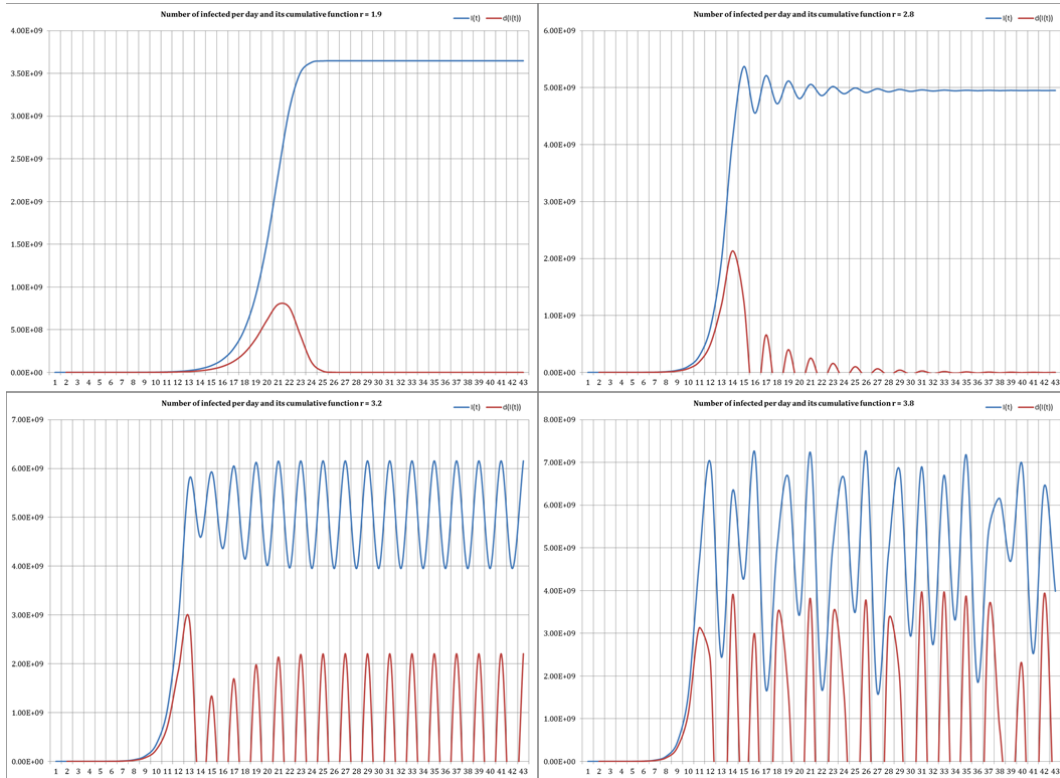

Figure 3: Number of infected obtained for the logistic map as a function of  $r$  for the different options, from  $r = 1.9$  to  $r = 3.8$ .

158 reached, if no intervention was applied for each country, are shown at the table 2.

159 Therefore the basic quantity used to make predictions is the number of infected  $I(t)$  reported  
 160 by each country or region. This model does not need considering asymptomatic infected or  
 161 questions what is the real number of infected, but makes use of the data reported. However,  
 162 as demonstrated in the case of the "Diamond Princess" cruise, nearly the 70% of the infected  
 163 would be asymptomatic and undiagnosed [Emery et al., 2020].

164 Other quantities needed to provide advice to the authorities are the number of inpatients  
 165 who would need medical attention at the hospital ( $H_n$ ), the number of those who would need  
 166 intensive care ( $C_n$ ) and the number of deaths ( $D_n$ ), all of them at each time  $t$ .  $H_n$  and  $D_n$  are  
 167 calculated as a fraction of the number of the diagnosed infected cases at time  $t$  ( $I_n$ ), and  $C_n$   
 168 as fraction of  $H_n$ . Obviously the number of recovered patients ( $R_n$ ) is given by the fraction  
 169  $(1 - D_n)$ . The fraction used to calculate  $D_n$  in this way is referred to as the case fatality  
 170 rate (CFR), determined as  $CFR = \frac{D_n}{D_n + R_n}$ . This is proved to be more practical during the  
 171 outbreak than other approaches as the mortality rate for the whole population which can be

Table 2: Growth parameter  $r$  for the logistic map, empirically calculated for the same countries during the first days of the spread of the COVID-19 epidemics, and equilibrium value for the infected people if no countermeasures were applied.

| Country     | $r$ | $I(\infty)$ (millions) |
|-------------|-----|------------------------|
| France      | 1.8 | 29.7                   |
| USA         | 1.3 | 75.7                   |
| Slovenia    | 2.2 | 1.1                    |
| Norway      | 2.0 | 2.7                    |
| Italy       | 3.0 | 40.2                   |
| UK          | 1.4 | 19.0                   |
| Spain       | 1.5 | 15.5                   |
| Belgium     | 1.7 | 3.8                    |
| South Korea | 2.0 | 51.6                   |
| Germany     | 1.8 | 36.9                   |

172 only experimentally known at the end of the epidemic.

173 A delay must be included to represent the time elapsed between a death and its report to the  
 174 authorities, including the time needed to perform the diagnoses (usually by using polymerase  
 175 chain reaction - PCR - technique).

176 All of these numbers are crucial to policy makers in order to take well founded decisions.  
 177 However, to perform reliable predictions an appropriate calibration of the model is needed  
 178 which will depend on the specific situation of each phase of the epidemics.

## 179 Initial parametrization

180 All the parameters of the model are empirically calibrated by averaging the available infor-  
 181 mation in a studied region. This calibration is feasible at the early stages, when the data  
 182 available cover only few days, but it can also be dynamically adjusted during the whole  
 183 evolution of the epidemics. For performing reliable predictions at the very beginning of the  
 184 outbreak, the information from previously infected countries can be used as initial calibration  
 185 of the model.

186 SARS-CoV-2 is assumed to infect with the same probability to every human, disregarding  
 187 sex or age. Being a new human virus, no immunization was previously acquired, by natural  
 188 or artificial (vaccine) means. For that reason the number of people which can be infected,  
 189  $N$ , was initially assumed to be the whole population of the studied region, whatever the size  
 190 of that region is. For the sake of simplicity the total population of a country (or a region,



191 as are the so-called autonomous communities in Spain) is initially used. In the case of Spain  
 192 the total population  $N = 46.6 \cdot 10^6$  was initially used.

193 The daily infection rate,  $r$ , can be dynamically determined - using all the data collected to  
 194 average a given period - dividing the number of infected the day  $n+1$  ( $I_{n+1}$ ) by the number  
 195 of infected at day  $n$  ( $I_n$ ). For Spain, averaging the daily infection rate during the first 7 days  
 196 of the outbreak, from the 26<sup>th</sup> of February to the 3<sup>rd</sup> of March, an  $r = 1.5$  was obtained.  
 197 Following the same method  $r$  values were obtained for 10 countries (see table 2). This  
 198 parameter however with the actions taken by the governments and the population, as the  
 199 social distancing, the frequent hands washing or the use of masks.

200 The fraction of the infected who need to be hospitalized ( $H = \frac{H_n}{I_n}$ ) is dynamically determined  
 201 using the data acquired at each region (or state, or country), averaged for the whole period  
 202 since the beginning of the epidemic. The same was done for the fraction of inpatients needing  
 203 an ICU ( $C = \frac{C_n}{H_n}$ ). An initial factor of patients needing an ICU from the number of infected  
 204 cases  $H \cdot C = 0.05$  to  $0.15$  was computed from the studies in Eastern countries.

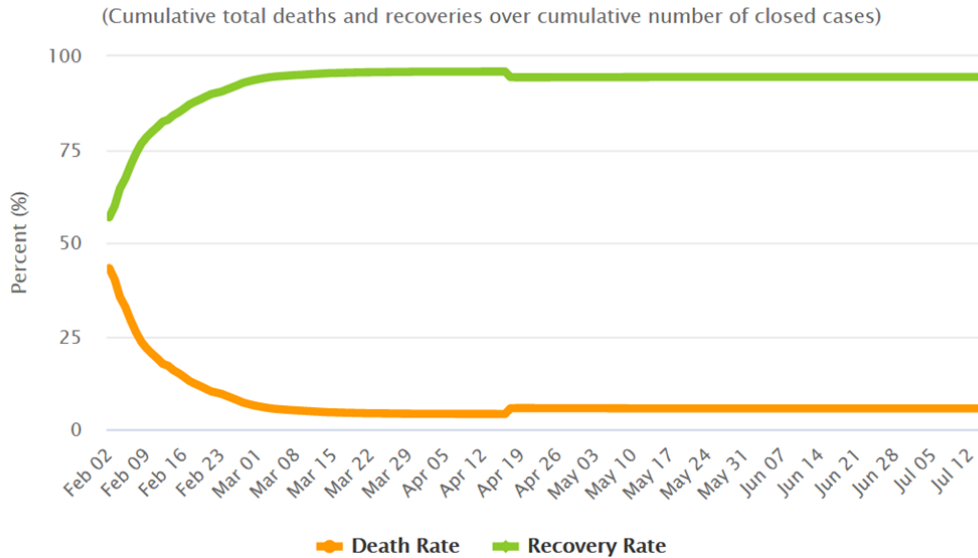

Figure 4: Case Fatality Rate as measured in China since the beginning of February 2020. The value measured the 4<sup>th</sup> of March of 5.78% was taken for the model.

205 As the reported data for the infected patients were given as accumulated since the beginning  
 206 of the epidemic, all the other quantities were also obtained as cumulative functions. Due to  
 207 its special configuration of the health system, this was a problem in Spain, as different regions  
 208 decided to report different quantities and then initially was impossible to obtain accumulated  
 209 data for hospitalized persons, or patients which needed an ICU for the country. Daily rates

210 were interesting to calculate, for instance, the day where the maximum of infections or deaths  
211 (peak of the curve) would occur.

212 For the CFR, the value measured near the equilibrium in China was used ( $CFR = 0.0578$ ,  
213 as measured the 4<sup>th</sup> of March - see figure 4 to see the evolution of the CFR in China <sup>1</sup>).  
214 This parameter presented a similar behaviour in many other countries, reaching a value at  
215 equilibrium of nearly a 5%. The high CFR values observed at the beginning of the epidemics  
216 in every country are probably due to several joint factors, including the weakness of the more  
217 vulnerable population (very old, already sick, people), or the lack of knowledge on which  
218 medical treatments were more effective. Those factors improved with time. In the cases of  
219 European countries a similar evolution was observed, although the decrease was slower than  
220 happened in China (at the beginning of April 2020 the CFR for USA was 0.3998, for Italy  
221 was 0.3557, and for Spain was 0.2052). The time delay, from the diagnose of an infected  
222 patient to the possible death, was adjusted at each country using real data. In the initial  
223 stages the observed delay was of 5 to 10 days for all the countries and reduced after some  
224 days.

## 225 Parametrization during the lock-down

226 A non pharmaceutical intervention used in China and many other countries, included Spain,  
227 was the so called 'lock-down' in which the population is required to stay at home and only  
228 leave if essential. This NPI has been partially implemented in some regions and totally in  
229 others, including the region of Hubei in China (58.5 million inhabitants), Spain (46.6 million  
230 inhabitants) or Italy (60.4 million inhabitants).

231 In each region or country the initial value used for  $N$  was its total population, but after  
232 the lock-down, the number of people already infected, or in contact with infectious people,  
233 is fixed and therefore  $N$  would be smaller. This number cannot be determined before the  
234 lock-down but can be calculated the same day that the lock-down is implemented by using  
235 the number of infected measured at that exact time. A first estimation was made using the  
236 number of infected, estimated with the model, 14 days after beginning the lock-down (14 days  
237 was assumed to be the incubation period for the COVID-19) and multiplying that number  
238 by a factor of 10, which would provide the total infected. This method provides a rough  
239 estimation which needs further refinements when new data are obtained, however it provided  
240 valid estimations for forecasting the time when the maximum (peak) for daily new cases of  
241 diagnosed cases or deaths would be expected.

242 As expected, the daily infection rate  $r$  was observed to decrease, from the rate the day before  
243 the NPI was applied (typically around 1.3) to a number slightly higher than 1.0, as observed  
244 at South Korea. The same behaviour was observed in every country and at every scale. After

---

<sup>1</sup>Source of information <https://www.worldometers.info/coronavirus/> (consulted on March 11<sup>th</sup>)

245 the lock-down is implemented, the  $r$  parameter can be fitted by least squares to the curve  
 246 given in equation 2, for the given region or country.

$$r = 1 + A \cdot e^{-\alpha \cdot t} \quad (2)$$

247 Where  $t$  is the time in days since the lock-down and  $A$  and  $\alpha$  are constants empirically  
 248 determined at the location. Table 3 shows some values for  $A$  and  $\alpha$  adjusted for different  
 249 countries after a lock-down was implemented and examples of smaller scale regions within  
 250 Spain (Andalusia and Catalonia were chosen for this example because they are the two more  
 251 populated regions in Spain). Those values were obtained by fitting the equation 2 to the  
 252 experimental data in different regions or countries. (\*Experimental data from worldometer  
 253 <sup>2</sup>. \*\*Experimental data from the Spanish official source of information <sup>3</sup>).

Table 3: Values obtained by fitting equation 2 to the experimental data in different countries and two Spanish regions (Catalonia and Andalusia).

| Region       | $A$   | $\alpha$ |
|--------------|-------|----------|
| South Korea* | 0.226 | 0.235    |
| Italy*       | 0.293 | 0.070    |
| UK*          | 0.326 | 0.051    |
| Spain**      | 0.295 | 0.074    |
| Andalusia**  | 0.366 | 0.096    |
| Catalonia**  | 0.491 | 0.109    |

254 The number of individuals infected before the lock-down ( $N$ ), and the constants  $A$  and  $\alpha$   
 255 cannot be determined prior to the lock-down, as different groups of individuals or societies  
 256 behave differently under the same exact government instructions, and also different govern-  
 257 ments provided slightly different instructions. So the only chance to obtain good predictions  
 258 after the lock-down is to wait for several days to obtain experimental data to be used to fit  
 259 the curve under the equation 2. It should be also pointed out that, some sources of informa-  
 260 tion provided data shifted in time or simply just different and consequently the fitting could  
 261 provide different values for the parameters.

262 The parameters  $H$  and  $C$  were determined by averaging the empirical values from the studied  
 263 region. In Spain the values obtained as an average up to the 6<sup>th</sup> of April were  $H = 0.467$  and  
 264  $C = 0.1497$ , which indicates that a high rate of diagnosed infected needed to be hospitalized,  
 265 or more likely, that only severe cases were diagnosed at the hospitals, needing half of them  
 266 to be admitted. Also a high percentage of the inpatients (almost a 15%) needed intensive

---

<sup>2</sup>Source of information <https://www.worldometers.info/coronavirus/> (consulted on April 17<sup>th</sup>)

<sup>3</sup>Source of information 'Instituto de Salud Carlos III' (ISCIII): <https://covid19.isciii.es/>

267 care using ventilators, which was in agreement with the observed pattern in China and other  
268 countries. In this case  $H \cdot C = 0.07$  (7%) which was in a good agreement with the initial range  
269 observed for the inpatients needing an ICU. As all parameters were dynamically calculated  
270 every day, the predictions were slightly calibrated daily.

271 Also for the CFR empirical values were used, as the equilibrium value taken from China was  
272 well surpassed in the initial stages in many European countries, although it tended to the  
273 same equilibrium value (nearly 5%). Although initially it reached values of even a 50%, the  
274 experimental CFR in Spain, as in UK, Belgium, or Italy, was 0.12 (12%) by April. The delay  
275 applied from reporting the positive diagnose of a patient to the death (when produced) was  
276 reduced to 3 days.

## 277 Parametrization after easing the lock-down

278 When a region or a country decides to relax the confinement, the parameters need a new  
279 calibration to take into account the situation.

280 When the lock-down is completely abandoned  $N$  would return to be again the whole popu-  
281 lation of the region or country. However, this was not the situation in every country.

282 For example, in Spain the lock-down was established the 15<sup>th</sup> of March. Although the ideal  
283 situation would be to maintain the total lock-down until  $r$  reached a value close to 1, value  
284 expected to happen by the end of April according with the model, the 13<sup>th</sup> of April some  
285 relaxation was adopted, allowing most of the workers to return to their normal activities.  
286 A large part of the population remained confined, but a graded approach was established  
287 to remove it before the end of May. This being the situation, the parameters can be only  
288 inferred after some data are collected, following the same methodology established during  
289 the lock-down. Therefore  $r$  should be fitted to an exponential decrease, following the same  
290 equation 2 after obtaining enough data. To perform initial conservative estimations a value  
291 of  $r = 1.03$  can be used.

$$r = 1.01 + B \cdot e^{-\beta \cdot t} \quad (3)$$

292 In the final stages of the easing of the lock-down, equation 3 was used for  $r$ , considering  
293 impossible to achieve a value  $r < 1.01$  (as the experience in other countries showed that  
294 reducing the level of daily infections below that value was, at least, very difficult).  $AB$  and  
295  $\beta$  are again constants empirically determined at the location

296 The rest of parameters:  $H$ ,  $C$  or the CFR remain being averaged along the whole period  
297 with real data.

298 This parametrization can be used to assess the evolution of the situation after easing the lock-  
299 down or to design the strategy to optimize the number of infected, hospitalized or inpatients  
300 needing an ICU, to avoid the saturation of the health system of a country.

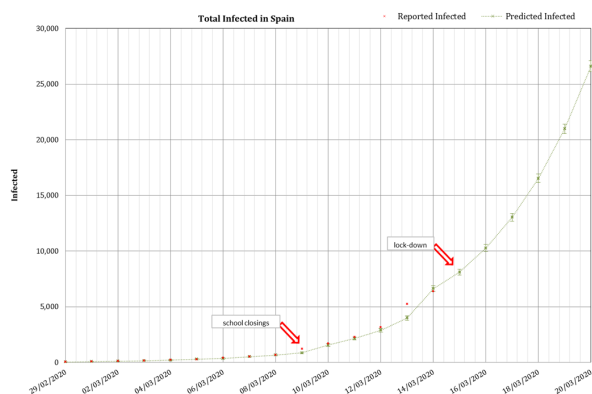

(a) Infected.

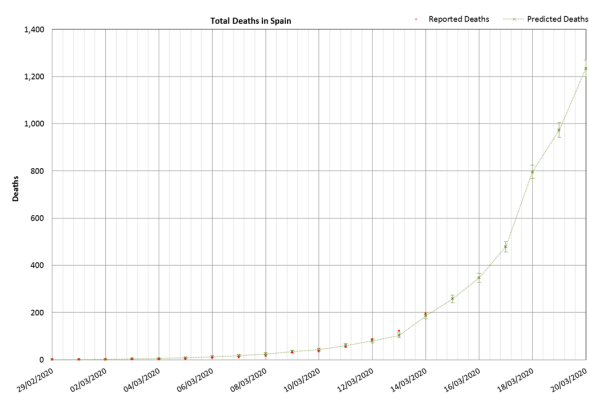

(b) Deaths.

Figure 5: Predicted number of infected and deaths in Spain from the 29<sup>th</sup> of February to the 20<sup>th</sup> of March. The data from the 14<sup>th</sup> of March are based in the model assuming no interventions were implemented. Red dots - reported. Green bars - modelled with uncertainty.

## RESULTS

As pointed out, 3 phases were considered:

- 1.- An initial phase of the outbreak where no severe restrictions were applied.
- 2.- A second phase where severe non pharmaceutical interventions (confinement) were applied.
- 3.- A last phase where relaxation of the more severe NPI is assumed, although some keep being used.

As an example the application of the model with the appropriate parametrization in Spain is presented to show the performance of the model. The same methodology was also used for some of the regions in Spain, and can be used to any other region or country of any size.

### Initial phase

The initial phase is considered before any countermeasure is applied. Figure 5 shows the cumulated number of infected and the total number of deaths reported in Spain (in red) from the 29<sup>th</sup> of February up to the 20<sup>th</sup> of March. From the 29<sup>th</sup> of February to the 14<sup>th</sup> of March reported data (in red) are shown against modelled values (in green). The schools closing was established from the 11<sup>th</sup> of March and the total lock-down the 15<sup>th</sup> of March.

As explained, during this initial stage,  $r = 1.05$  was calculated as an average of the values measured during the initial days of spread of the epidemics;  $N$  was the total population in

Spain ( $46.6 \cdot 10^6$  inhabitants); and the  $CFR = 0.0578$  was taken from the Chinese experience. In this phase the only parameter dynamically calibrated, to adjust the data reported daily, was the delay from the number of infected to the number of deaths, as was explained before, from an initial value of 7 days that was reduced up to a 2 days delay applied the 5<sup>th</sup> of March. In this specific case, the forecast indicated a number of infected cases of  $26,600 \pm 500$  and a number of deaths of  $1,230 \pm 150$  to occur 6 days later (11<sup>th</sup> of March). The real number of reported infected was 21,571 (19% difference), and the number of reported deaths was of 1,093 (11% difference). The number of inpatients needing an ICU and a ventilator was calculated as  $I(t) \cdot H(t) \cdot C(t)$ , providing a range of [1,330 - 3,990]. The reported number of inpatients which needed an ICU the 20<sup>th</sup> of March was of 1,630 (within the calculated range). Although in this initial stage many factors altered the real numbers the accuracy was reasonably good.

Predictions of the likely number of infected, hospitalized inpatients and total deaths were carried out using these conditions for the initial phase (uncontrolled spread of the disease). The model predicted that, if a severe NPI (total lock-down) was not adopted, but on the contrary the virus was left to spread without control, at the end of the epidemic in Spain 12 million people would have been infected, of which nearly 1 million people would need intensive care and about 700,000 infected would die directly because of the COVID-19 disease. However the number of deaths would likely be higher due to the saturation of the health system, as these numbers would occur in a very short period.

These results could provide an early idea of the urgent necessity of applying extreme NPIs like the total lock-down, they could be also used to predict the consequences of not applying the severe NPIs, and also to prepare for the capabilities of the ICUs, including the number of ventilators.

## Lock-down phase

In Spain closing of schools began on 11<sup>th</sup> of March and lock-down was established the 15<sup>th</sup> of March. All factors were re-calibrated for this second phase as stated, including a fitting of the daily infection rate to the curve given in equation 2. For the number of susceptible individuals  $N$  an initial estimation ( $N = 1.1 \cdot 10^6$ ) was carried out using the results of the model 14 days after the lock-down. An average value  $r = 1.32$  was used. Results of these early predictions are presented in figure 6. These values were later calibrated dynamically to  $r = 1.20$  and  $N \simeq 9 \cdot 10^6$  using data up to the 15<sup>th</sup> of March. Results of the predictions are presented in figure 7.

The application of the total lock-down to the model reduced the predictions carried out the 26<sup>th</sup> of March to a total of 194,000 infected, 85,700 hospitalized, nearly 8,600 with needs of an ICU and  $19,500 \pm 1,400$  deaths to occur by the 17<sup>th</sup> of April. The real numbers reported at that date were 197,142 infected (1.6% difference), 7,548 inpatients needing an ICU (12%

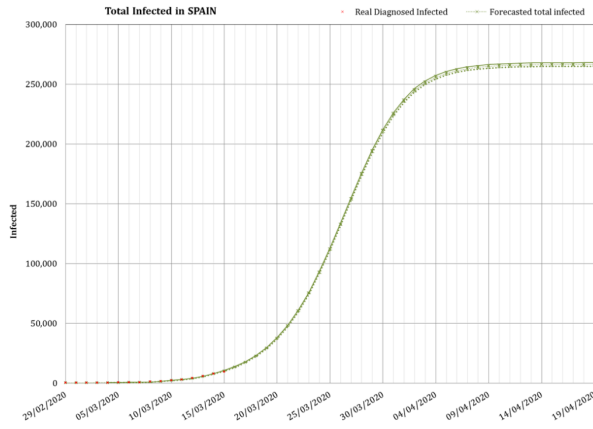

(a) Total Infected.

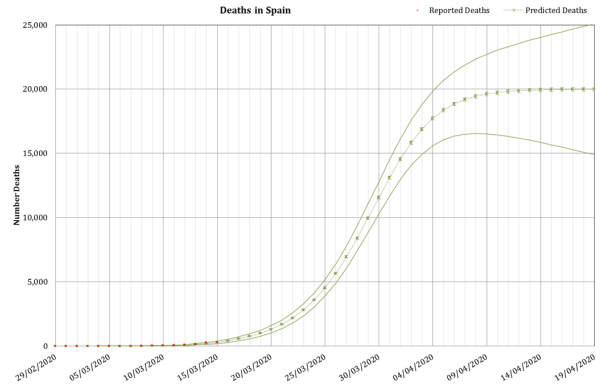

(b) Total Deaths.

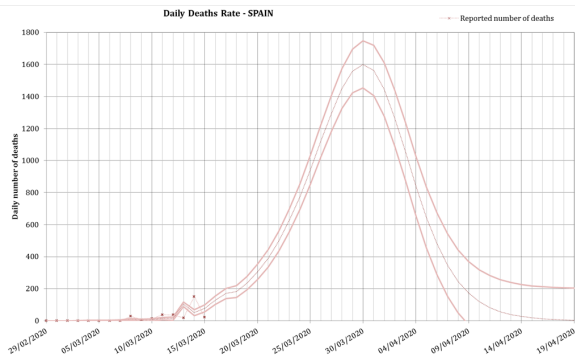

(c) Daily Deaths.

Figure 6: Total number of infected, total deaths and daily deaths in Spain predicted from the 29<sup>th</sup> of February to the 19<sup>th</sup> of April. The preliminary results assumed the total lock-down since the 15<sup>th</sup> of March with data up to the 14<sup>th</sup> of March. Red dots - reported data. Green bars - modelled values with uncertainty.

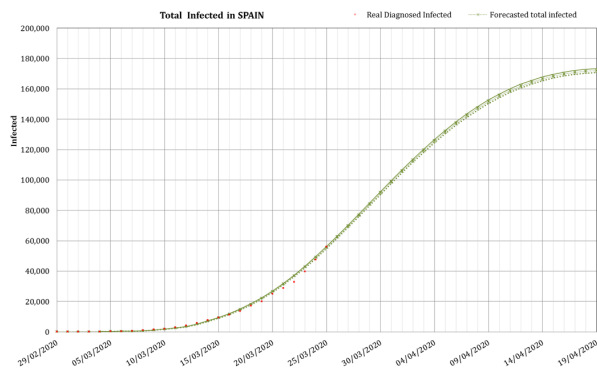

(a) Total Infected.

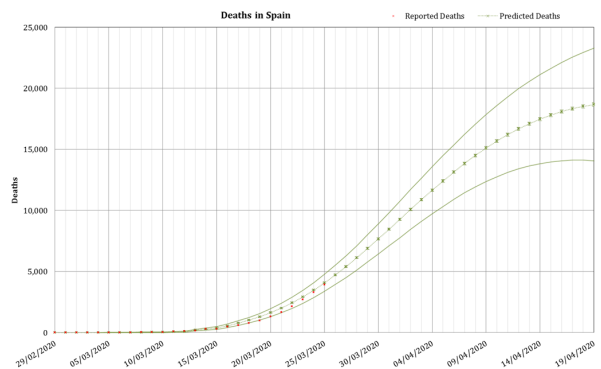

(b) Total Deaths.

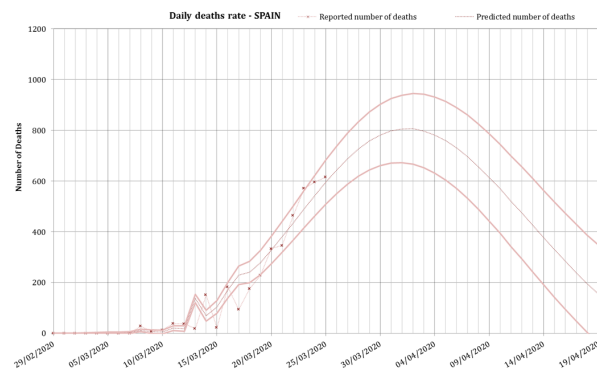

(c) Daily Deaths.

Figure 7: Total number of infected, total deaths and daily deaths in Spain predicted from the 29<sup>th</sup> of February to the 19<sup>th</sup> of April. These second modelled results assumed the total lock-down since the 15<sup>th</sup> of March and were calibrated with data up to the 25<sup>th</sup> of March. Red dots - reported data. Green bars - modelled values with uncertainty.



355 difference) and 20,043 deaths (2.7 % difference). The model predicted the peak for the rate  
356 of daily deaths to occur between the 29<sup>th</sup> of March and the 3<sup>th</sup> of April. In reality the peak,  
357 after the administration revised the data (two months later), occurred the 31<sup>st</sup> of March.

## 358 **Unlocking phase**

359 The last phase is the ease of the lock-down. In this case, predictions based on some hypothesis,  
360 carried out during April, are presented in this paper and compared with the real evolution.  
361 Again the case of Spain is presented as example. Using the models presented in this paper  
362 recommendations were provided to ease the lock-down around 21<sup>st</sup> of April [Mora, 2020]. In  
363 reality a partial unlock was decreed the 13<sup>th</sup> of April for non-essential workers, and a phased  
364 total unlocking from the 30<sup>th</sup> of April, where some activities were allowed gradually each week  
365 until the 21<sup>st</sup> of June, where normal activity was restored, although the population should  
366 follow NPI health countermeasures, as social distance, use of masks, washing of hands, etc.

367 After the unlocking many uncertainties appear, but the results of the model depend largely  
368 on the daily rate of infections  $r$ .

## 369 **Partial unlock**

370 On the 13<sup>th</sup> of April a partial ease of the total lock-down was applied in Spain.

371 In order to obtain conservative figures an initial forecast was carried out with the data  
372 available the 16<sup>th</sup> of April [Mora et al., 2020]. At that point only some reasonable hypotheses  
373 could be applied to calibrate  $N$  and  $r$ .

374 For  $N$  it was assumed that about a 20% of the total workforce (in Spain 20 million workers on  
375 2020) went back to work, as only some industries were allowed to begin again their activities,  
376 after that day. As those people could also infect their families, 2 further members on average,  
377 an initial  $N = 1.2 \cdot 10^7$  was taken. In order to carry out conservative predictions  $r = 1.03$  (a  
378 daily increase of the infected of a 3%) was taken. Results in figure 8 were obtained for those  
379 conservative assumptions.

380 Using these conservative values of  $N$  and  $r$ , some consequences in the partial ease of the lock-  
381 down could be extracted. First of all, the number of diagnosed infected people would increase  
382 continuously beyond May. In fact there would be a peak in the daily rate of infected by  
383 the 28<sup>th</sup> of May and a peak in the daily rate of deaths by the 1st of June. The total number  
384 of deaths in Spain by the end of April would reach the  $46,000 \pm 15,000$  under this scenario.  
385 That was the conservative value we published in April [Mora et al., 2020]. If this would have  
386 been the case ( $r > 1.03$ ) a saturation of the health system would have occurred again in  
387 Spain. So that value of  $r$  could be regarded as an upper bound which should be avoided.

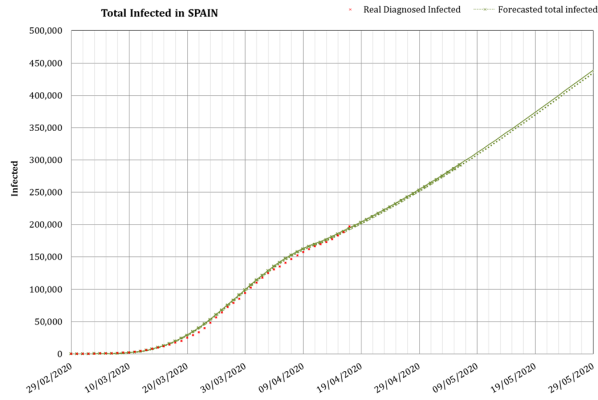

(a) Total Infected.

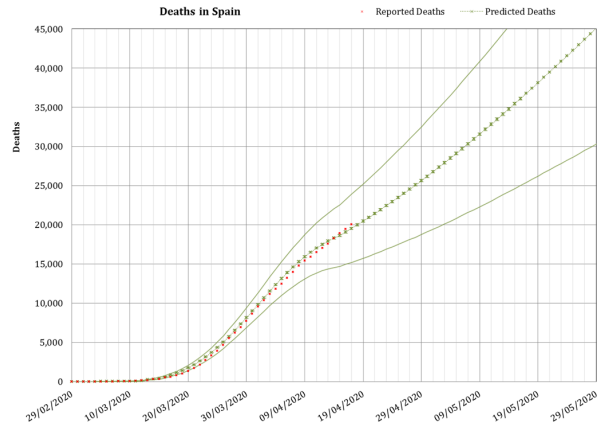

(b) Total Deaths.

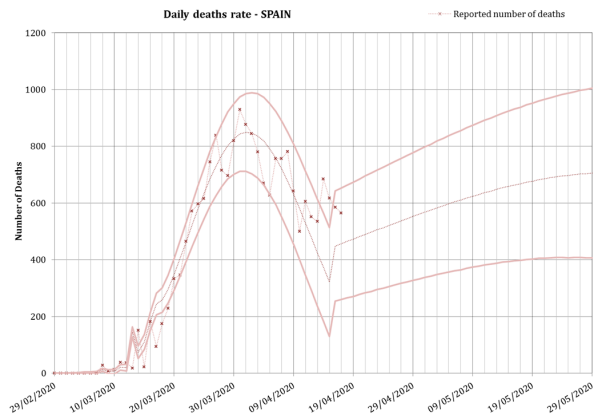

(c) Daily Deaths.

Figure 8: Total number of infected, total deaths and daily deaths in Spain predicted from the 29<sup>th</sup> of February to the 29<sup>th</sup> of May. These modelled results assumed the ease of the lock-down since the 13<sup>th</sup> of April with conservative assumptions for  $N$  and  $r$ . Red dots - reported data. Green bars - modelled values with uncertainty.

388 In reality, a very good behaviour of the Spanish population made  $r$  to continuously reduce  
389 even after a total easing of the lock-down.

## 390 Total unlocking

391 From the 4<sup>th</sup> of May a total unlock was applied in Spain, with a progressive increase in the  
392 mobility of the people since then, and therefore a recalibration was needed. For this phase  
393  $N$  was again considered the total population (46.6 millions inhabitants).

394 Obtaining some more data a least squares fit was performed using an initial daily infection  
395 rate  $r = 1.02$  (2% daily increase of infected) the day before the unlocking, and the equation  
396 3 to fit  $r$ . The calibration resulted in  $B = 0.03$  and  $\beta = 0.153$ , what gives the equation  
397  $r = 1.01 + 0.03 \cdot e^{(-0.153 \cdot t)}$ . The results obtained with this fit is shown in figure 9.

398 The series of data finishes at the end of May, as official aggregated data for Spain were no  
399 longer provided. In fact least squares fit was extremely difficult as there was an attempt  
400 to homogenize the data between the different regions in the country which made the whole  
401 series of data to be revised almost every day. That is one of the reasons why in this occasion  
402 the fitting was not as good as in previous phases for the total number of infected and the  
403 total number of deaths, as the focus was put in the daily number of deaths to obtain a good  
404 fitting. Daily number of deaths was the main endpoint in this phase because this indicator  
405 is the best one to perform future surveys of the situation of the epidemic.

406 The results obtained using this calibration for this final stage was that the number of di-  
407 agnosed infected people would slowly increase continuously beyond May. This is a logical  
408 result, as the infection would be always present in a slow rate until the virus is eradicated  
409 or there is a vaccine to control the spread of the disease. The predicted number of total  
410 infected is of  $317,500 \pm 1,700$  and the total number of deaths would be 37,100, with a huge  
411 uncertainty, by the 1<sup>st</sup> of August. The real numbers that day were 335,602 reported infected  
412 (5.7% difference) and 28,445 deaths (23% difference).

413 During the summer the situation was controlled, however if the good practices in the applica-  
414 tion of NPIs are abandoned: hands washing, social distance, use of masks, etc.,  $r$  could easily  
415 reach values above 1.03, surely another increase in the number of infected will occur. This will  
416 be the case also when borders are reopened and new infectious people (even asymptomatic)  
417 enter inadvertently from countries in the initial phase of the epidemics.

418 Of course, these predictions did not consider important changes, as the discovery of a vaccine -  
419 which seems extremely difficult in a short period of time -, or the increase in the temperatures  
420 in the summer which could reduce the infectivity of the SARS-CoV-2, or a higher isolation  
421 which could reduce the severity of the COVID-19 due to a higher production of vitamin D [Ilie  
422 et al., 2020, Panagiotou et al., 2020], or any other unforeseen circumstance. During that  
423 summer time, of course, the treatment of hospitalized patients has improved and therefore a  
424 smaller fraction of inpatients need an ICU or even die.

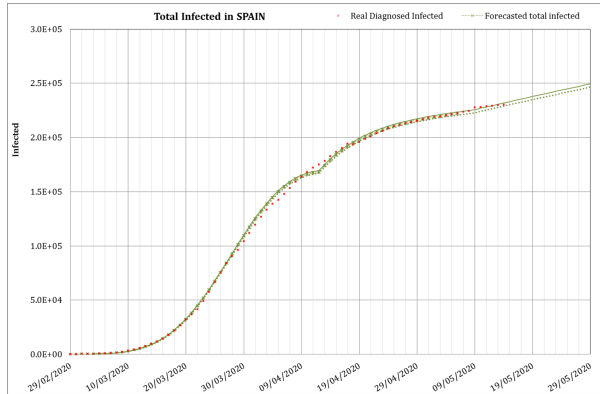

(a) Total Infected.

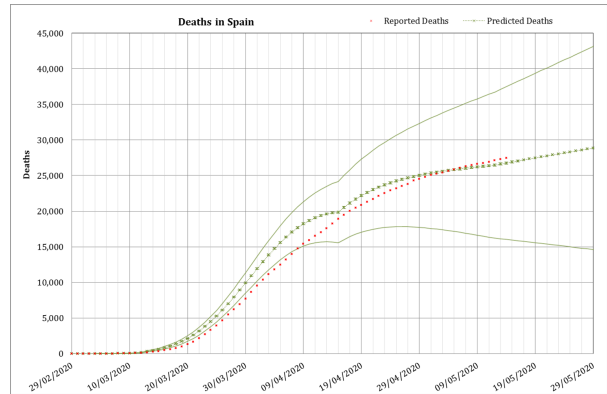

(b) Total Deaths.

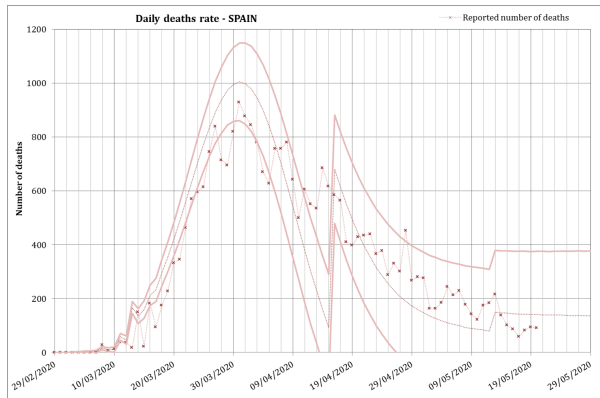

(c) Daily Deaths.

Figure 9: Total number of infected, total deaths and daily deaths in Spain predicted from the 29<sup>th</sup> of February to the 28<sup>th</sup> of June. These modelled results assumed the ease of the lock-down since the 13<sup>th</sup> of April. Red dots - reported data. Green bars - modelled values with uncertainties.

## Percentage of infected population in the regions

There was an additional result extracted from this model. The need to recalibrate it during the locking phase by fitting the parameter  $N$ , the number of people susceptible to be infected in that phase, offers the possibility of using that number to infer the percentage of the population in a country or region which could have been infected, for this particular virus, most of them showing no symptoms.

As an example these numbers were extracted for the autonomous communities (administrative regions) in Spain and transformed to three levels of infection (low – below 5% -, medium – from 5% to 10% and high – above 10%), giving rise to the result shown in figure 10a.

This qualitative result has an important use for the authorities, as the population which have a high level of infection by the SARS-CoV-2 did probably developed immunity against the virus (at least temporarily as discussed before), and therefore there is no chance for them to be infected again in the close future. And on the contrary, there is a bigger chance of developing further outbreaks of the disease in those regions where the percentage of the infected population was smaller.

The model provided some counter-intuitive results. For example, the capital of Spain, Madrid, presented "medium level" of infection of the population, whereas Catalonia showed "high level", while both, the number of diagnosed cases and the number of deaths in Madrid was higher, and this would imply a higher level of infection in Madrid. However this could be explained in the different criteria followed by the different regions for reporting the numbers. For example Catalonia decided by mid of May to include in the statistics the deaths of people occurred out of the hospitals, while it was unknown if Madrid was including those deaths already in the statistics. The same occurs with the number of diagnosed infected cases, as there is observed an increase in the number of tests performed on people who finally did not need a hospital in Madrid, the percentage in Catalonia of diagnosed population finally needing a hospital was still around 65% by May.

These predictions were compared against the extensive statistical program of immunity prevalence carried out on the Spanish population from April to June 2020, published at early July [ISCH, 2020] (see figure 10b). This study measured the percentage of people infected during the epidemic, taking account of asymptomatic infected persons, while the previous reported numbers included just the hospitalized inpatients showing severe symptoms on which a polymerase chain reaction (PCR) test returned a positive result. The results of both studies can be compared in figure 10.

As can be seen the results provided by the model in April were accurate in most of the regions where low infection occurred, as in the south (Andalucia, Extremadura, Ceuta, Melilla, Canary Islands, Balears Islands, Valencia and Murcia) or north-west (Galicia, Asturias and Cantabria) of Spain. However the model predicted a medium to high infection level at the whole north and north-east, whereas the measured levels of seroprevalence obtained low levels

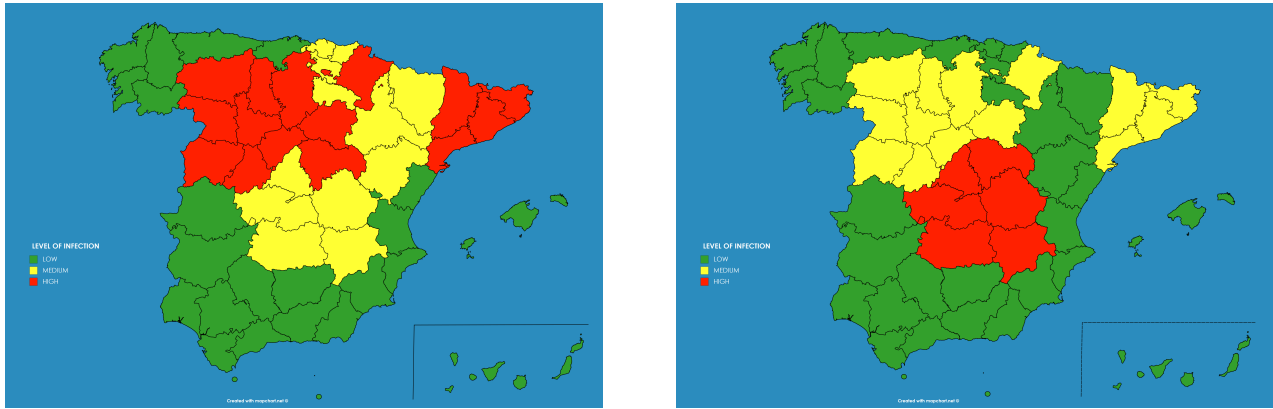

(a) Forecasted levels of infection [Mora et al., 2020]. (b) Measured levels of infection [ISCIII, 2020].

Figure 10: Levels of infection in the population at each region of Spain: calculated in April 2020 by using the model presented in this paper (left) and measured at the seroprevalence study ENE-COVID finished in July 2020 (right).

463 at some regions (La Rioja, Navarra and Basque Country). In general the forecast provided a  
 464 good general view of the infection level.

## 465 DISCUSSION AND CONCLUSIONS

466 As it is unlikely that a vaccine to the SARS-CoV-2 or a cure of the associated disease COVID-  
 467 19 is developed in the next few months, the only way of reducing the consequences of the  
 468 epidemic at this moment is an optimum application of the available NPIs.

469 A methodology based on the application of the logistic map in different phases of the COVID-  
 470 19 epidemic was shown and applied to the different phases to Spain. This methodology  
 471 provided good results in the forecast of the evolution of the disease in every country and  
 472 situation where it was applied.

473 The use of extreme non-pharmaceutical interventions, such as the total lock-down, showed  
 474 their effectiveness during the period they were applied. However, easing the countermeasures  
 475 allow new outbreaks of the infection to appear. This situation forces the need of applying  
 476 many simultaneous techniques to reduce the effect of the disease if that is the case. One  
 477 of those techniques could be the application of the methodology described in this paper to  
 478 provide early alerts of the outbreaks in countries or smaller units of population, allowing an  
 479 optimization of sanitary resources and reducing the economic and social impact of future  
 480 NPIs applied locally.

481 As was shown, reasonably accurate results can be produced by using the model presented  
482 in this paper to the different phases of an epidemic. In a previous preprint, assuming an  
483 infection daily rate  $r$  of 3%, a total number of 400 000 diagnosed infected and a total number  
484 of  $46\,000 \pm 15\,000$  deaths were forecasted in Spain by the end of May [Mora et al., 2020].  
485 Those predictions overestimated the real values due to a more strict reduction of the infection  
486 daily rate in the country, reaching values below 1%.

487 The forecasts covered from the number of infected, hospitalized, inpatients needing an ICU  
488 or deaths, to the time where the peak of daily deaths would be produced or the level of  
489 infection in a given region. In the last prediction, carried out for the beginning of August,  
490  $317,500 \pm 1,700$  infected and a total number of deaths of 37,100 were predicted, with a  
491 huge uncertainty, to be compared with the real numbers of 335,602 reported infected (5.7%  
492 difference) and 28,445 deaths (23% difference).

493 The aim of any policy dealing with the application and withdrawal of NPI should carefully  
494 consider daily infection rates. In the case of the COVID-19 a daily infection rate  $r$  lying within  
495 the range of 1.01 to 1.02 (1% to 2% daily increase), as was shown in countries like South  
496 Korea, would produce a manageable level of people needing an ICU in hospitals, avoiding the  
497 saturation of national healthcare systems and therefore unnecessary deaths.

498 Also a qualitative prediction of the percentage of the population infected in the different re-  
499 gions of Spain was performed by using the suggested semi-empirical model. These predictions  
500 were compared against the extensive statistical program of immunity prevalence carried out  
501 on the Spanish population from April to June 2020, published at early July, showing that the  
502 model provided in April reasonable results in most of the regions, although the model pre-  
503 dicted a medium to high infection level at the whole north and north-east, while the measured  
504 levels of seroprevalence obtained low levels. Some results obtained with this methodology were  
505 not intuitive according to the official information. The more counter-intuitive result probably  
506 being the higher level of infection of Catalonia compared with Madrid region. As said, in  
507 general the forecast provided a good forecast of the infection level.

508 The COVID-19 epidemic is still ongoing and the knowledge will increase with time. In the  
509 next future new outbreaks are foreseen in the countries where the first one was controlled,  
510 unless a vaccine or a cure are developed in the next future. Therefore models will be needed  
511 to forecast again the evolution and to advice the authorities in the needs of the country's  
512 health system. Some characteristics of the virus, needed to perform better predictions, are  
513 still unknown, as the lost of immunity of cured individuals or the influence of vitamin D in  
514 the severity of the disease.

515 A continuous watch of the disease is still needed to provide proper advice which can be used  
516 by policy makers.

## FUNDING AND ACKNOWLEDGEMENTS

This work has not received external funding.

We want to acknowledge all the colleagues who have constructively read and discussed the paper to improve its content.

## References

- [Brauer, 2008] Brauer, F. (2008). *Compartmental Models in Epidemiology.*, pages 19–79. Springer Berlin Heidelberg, Berlin, Heidelberg.
- [Caudill, 2020] Caudill, L. (2020). Lack of data makes predicting covid-19’s spread difficult but models are still vital. <https://theconversation.com/lack-of-data-makes-predicting-covid-19s-spread-difficult-but-models-are-still-vital-135797>. (Accessed April 15, 2020).
- [Emery et al., 2020] Emery, J. C., Russel, T. W., Liu, Y., Hellewell, J., Pearson, C. A., Knight, G. M., Eggo, R. M., Kucharski, A. J., Funk, S., Flasche, S., and Houben, R. M. G. J. (2020). The contribution of asymptomatic sars-cov-2 infections to transmission - a model-based analysis of the diamond princess outbreak. *medRxiv*.
- [Feng et al., 2010] Feng, L., Kumar, M., and Mark, L. (2010). An optimal control theory approach to non-pharmaceutical interventions. *BMC Infectious Diseases*, 10.
- [Fokas et al., 2020] Fokas, A. S., Dikaios, N., and Kastis, G. A. (2020). Predictive mathematical models for the number of individuals infected with covid-19. *medRxiv*.
- [Gorbalenya et al., 2020a] Gorbalenya, A. E., Baker, S. C., Baric, R. S., de Groot, R. J., Drosten, C., Gulyaeva, A. A., Haagmans, B. L., Lauber, C., Leontovich, A. M., Neuman, B. W., Penzar, D., Perlman, S., Poon, L. L., Samborskiy, D., Sidorov, I. A., Sola, I., and Ziebuhr, J. (2020a). Severe acute respiratory syndrome-related coronavirus: The species and its viruses – a statement of the coronavirus study group. *bioRxiv*.
- [Gorbalenya et al., 2020b] Gorbalenya, A. E., Baker, S. C., Baric, R. S., de Groot, R. J., Drosten, C., Gulyaeva, A. A., Haagmans, B. L., Lauber, C., Leontovich, A. M., Neuman, B. W., Penzar, D., Perlman, S., Poon, L. L. M., Samborskiy, D. V., Sidorov, I. A., Sola, I., Ziebuhr, J., and Coronaviridae Study Group of the International Committee on Taxonomy of, V. (2020b). The species severe acute respiratory syndrome-related coronavirus: classifying 2019-ncov and naming it sars-cov-2. *Nature Microbiology*, 5(4):536–544.
- [Ilie et al., 2020] Ilie, P. C., Stefanescu, S., and Smith, L. (2020). The role of vitamin d in the prevention of coronavirus disease 2019 infection and mortality. *Aging Clinical and Experimental Research*, 32(7):1195–1198.



- 549 [ISCIH, 2020] ISCIH (2020). Estudio ene-covid: Informe final estudio nacional de sero-  
550 epidemiología de la infección por sars-cov-2 en españa.
- 551 [Kermack et al., 1927] Kermack, W. O., McKendrick, A. G., and Walker, G. T. (1927). A  
552 contribution to the mathematical theory of epidemics. *Proc. R. Soc. Lond.*, 115:700–721.
- 553 [Liu et al., 2020] Liu, Y., Gayle, A. A., Wilder-Smith, A., and Rocklöv, J. (2020). The  
554 reproductive number of COVID-19 is higher compared to SARS coronavirus. *Journal of*  
555 *Travel Medicine*, 27(2). taaa021.
- 556 [Mora, 2020] Mora, J. C. (2020). Prediction of the Advance of the SARS-CoV-2 Virus (covid-  
557 19) - three reports issued on 15th and 26th of march and 7th of april 2020.
- 558 [Mora et al., 2020] Mora, J. C., Perez, S., Rodriguez, I., Nunez, A., and Dvorzhak, A. (2020).  
559 A Semiempirical Dynamical Model to Forecast the Propagation of Epidemics: The case of  
560 the SARS-CoV-2 in Spain. *medRxiv*.
- 561 [Munz et al., 2009] Munz, P., Hudea, I., Imad, J., and Smith, R. J. (2009). When zombies  
562 attack!: Mathematical modelling of an outbreak of zombie infection. In *J.M. Tchenche*  
563 *and C. Chiyaka, editors, Infectious Disease Modelling Research Progress*, pages 133–150.  
564 Nova Science Publishers, Inc.
- 565 [Panagiotou et al., 2020] Panagiotou, G., Tee, S. A., Ihsan, Y., Athar, W., Marchitelli, G.,  
566 Kelly, D., Boot, C. S., Stock, N., Macfarlane, J., Martineau, A. R., Burns, G., and Quinton,  
567 R. (2020). Low serum 25-hydroxyvitamin d (25[oh]d) levels in patients hospitalised with  
568 covid-19 are associated with greater disease severity. *Clinical Endocrinology*.
- 569 [Pelczar JR. et al., 2010] Pelczar JR., M. J., Chan, E., and Kieg, N. R. (2010). *Microorgan-*  
570 *ism and Disease: Microbial Diseases.*, page 656. Mc Graw Hill, Tata, Berlin, Heidelberg.
- 571 [Prompetchara et al., 2020] Prompetchara, E., Ketloy, C., and Palaga, T. (2020). Immune  
572 responses in covid-19 and potential vaccines: Lessons learned from sars and mers epidemic.  
573 *Asian Pac J Allergy Immunol*, 38:1–9.
- 574 [Roda et al., 2020] Roda, W. C., Varughese, M. B., Han, D., and Li, M. Y. (2020). Why is it  
575 difficult to accurately predict the covid-19 epidemic? *Infectious Disease Modelling*, 5:271  
576 – 281.
- 577 [Velavan and Meyer, 2020] Velavan, T. P. and Meyer, C. G. (2020). The covid-19 epidemic.  
578 *Tropical medicine and international health*, 25(3):278–280.
- 579 [Wang et al., 2020] Wang, J., Tang, K., Feng, K., and Lv, W. (2020). High temperature and  
580 high humidity reduce the transmission of covid-19. *SSRN*.
- 581 [World Health Organization, 2020] World Health Organization (2020). Coronavirus disease.

582 [Wu et al., 2020] Wu, K., Darcet, D., Wang, Q., and Sornette, D. (2020). Generalized logistic  
583 growth modeling of the covid-19 outbreak in 29 provinces in china and in the rest of the  
584 world. *medRxiv*.

585 [Zhu et al., 2020] Zhu, N., Zhang, D., Wang, W., Li, X., Yang, B., Song, J., Zhao, X., Huang,  
586 B., Shi, W., Lu, R., Niu, P., Zhan, F., Ma, X., Wang, D., Xu, W., Wu, G., Gao, G. F.,  
587 and Tan, W. (2020). A novel coronavirus from patients with pneumonia in china, 2019.  
588 *New England Journal of Medicine*, 382(8):727–733.
